# Supplementary material for: Plasmons Coupling and&nbsp;Anti-Crossing&nbsp;of Nanometal&nbsp;Asymmetric Dimer
Source: Research Square preprint supplement (doi:10.21203/rs.3.rs-162249/v1), 2021-02-08
Supplement: Supplementary file 1 [file 0f4c02270b70c20f79d5ca78.docx]

**Fig. 5** The evolution of the eigenfrequency of the coupled oscillators; **(a)** the evolution of the two eigenvalues of the coupled oscillators with the change of the resonant frequency difference of the two oscillators for the case  ; **(b)** the symmetrical anti-cross evolution of the eigenfrequencies of the coupled oscillators for the case and ; **(c)** the symmetric evolution of the eigenfrequencies of the coupled oscillators for the case.
